# Supplementary material for: Cumulative inflammatory burden and obesity as determinants of insulin resistance in patients with established rheumatoid arthritis: cross-sectional study
Source: PubMed Central journal article supplement — BMJ Open. 2021 Feb 9;11(2):e044749. doi: 10.1136/bmjopen-2020-044749 (PMC7875272; doi:10.1136/bmjopen-2020-044749), 2021-02-09
Supplement: bmjopen-2020-044749supp001.pdf [file bmjopen-2020-044749supp001.pdf]

**Table S1. Laboratory tests.**

| Test                                | Method/Reference range                                                                                                 |
|-------------------------------------|------------------------------------------------------------------------------------------------------------------------|
| High-sensitivity C-reactive protein | Standard nephelometry (reference range, 0-6 mg/l)                                                                      |
| TNF- $\alpha$                       | Automated immunoassay (Immulite®, Diagnostic Products Corporation, Los Angeles, CA, USA; reference range, 0-8.1 pg/ml) |
| IL-6                                | Enzyme-linked chemiluminescent assay (QuantiGlo®; normal range, 0-5.84 pg/ml).                                         |
| IL-1 $\beta$                        | Enzyme-linked chemiluminescent assay (QuantiGlo®) pg/ml                                                                |
| Adiponectin                         | Enzyme-linked chemiluminescent assay (Mediagnost®) (mean [SD] reference value, 11.5 [5.9] ng/ml)                       |
| Resistin                            | Enzyme-linked chemiluminescent assay (Mediagnost®) (median [IQR] reference value, 7.2 [5.4-8.5] ng/ml)                 |
| Leptin                              | Enzyme-linked chemiluminescent assay (Mediagnost®).                                                                    |

|               |                                                                                                                               |
|---------------|-------------------------------------------------------------------------------------------------------------------------------|
|               | (according to the manufacturer, normal values lie between the 5th and 95th percentiles after adjusting for sex and BMI ng/ml) |
| IGF-1         | Enzyme-linked chemiluminescent assay (Quantikine®)( pg/ml)                                                                    |
| Serum insulin | Enzyme-amplified chemiluminescent assay (Immulite ONE®) (μU/ml)                                                               |
| LDL-Ox        | Enzyme-amplifiedchemiluminescent assay (Immulite ONE®)(U/l)                                                                   |

TNF- $\alpha$ , tumor necrosis factor alpha; IL, interleukin; IGF-1,insulin-like growth factor 1;LDL,low-densitylipoprotein; ELISA, enzyme-linked immunosorbent assay. LDL-Ox, Oxidized low-density lipoprotein
